# Supplementary material
Source: PubMed Central journal article supplement (PMC4396362)
Supplement: ncomms7498-s1.pdf [file ncomms7498-s1.pdf]

## Supplementary Information

### Supplementary Figure 1

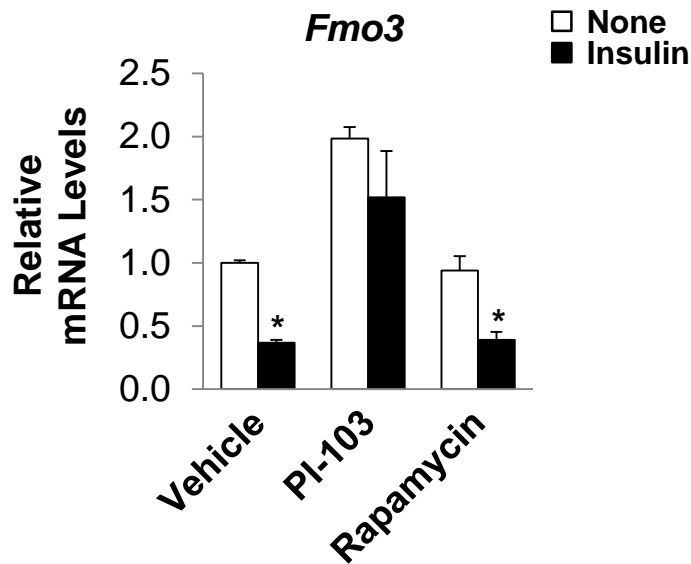

#### Supplementary Figure 1. *In vitro* regulation of FMO3 in primary rat hepatocytes.

Primary rat hepatocytes were pre-treated with PI-103, an inhibitor of PI 3-kinase or rapamycin, an inhibitor of the mTORC1 complex, for 30 minutes prior to insulin stimulation. Data represent the mean  $\pm$  SEM of triplicate wells; representative results of three independent experiments are shown. \*  $p < 0.05$  (Student's t-test) insulin treated versus untreated or vehicle treated cells.

Supplementary Figure 2

□ Control ASO  
 ■ FMO3 ASO

**a**

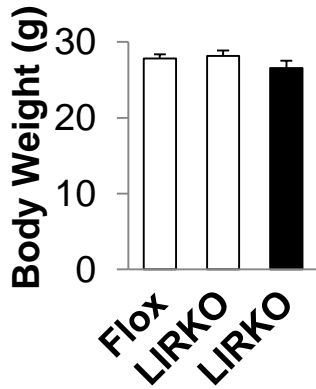

**b**

|                      | ALT<br>(IU L <sup>-1</sup> ) | AST<br>(IU L <sup>-1</sup> ) | Albumin<br>(mg dL <sup>-1</sup> ) | Total<br>Bilirubin<br>(mg dL <sup>-1</sup> ) | BUN<br>(mg dL <sup>-1</sup> ) | Creatinine<br>(mg dL <sup>-1</sup> ) |
|----------------------|------------------------------|------------------------------|-----------------------------------|----------------------------------------------|-------------------------------|--------------------------------------|
| Flox                 | 20.25 ± 2.17                 | 44.25 ± 1.75                 | 2.09 ± 0.13                       | 0.0675 ± 0.009                               | 30.28 ± 2.76                  | 0.0225 ± 0.0075                      |
| LIRKO<br>Control ASO | 63.40 ± 7.25*                | 236.40 ± 21.18*              | 1.84 ± 0.13*                      | 0.132 ± 0.017*                               | 40.84 ± 0.92                  | 0.070 ± 0.0158*                      |
| LIRKO<br>FMO3 ASO    | 63.75 ± 8.74                 | 169.50 ± 21.18               | 1.65 ± 0.07                       | 0.090 ± 0.016                                | 41.70 ± 1.75                  | 0.0325 ± 0.0075                      |

**c**

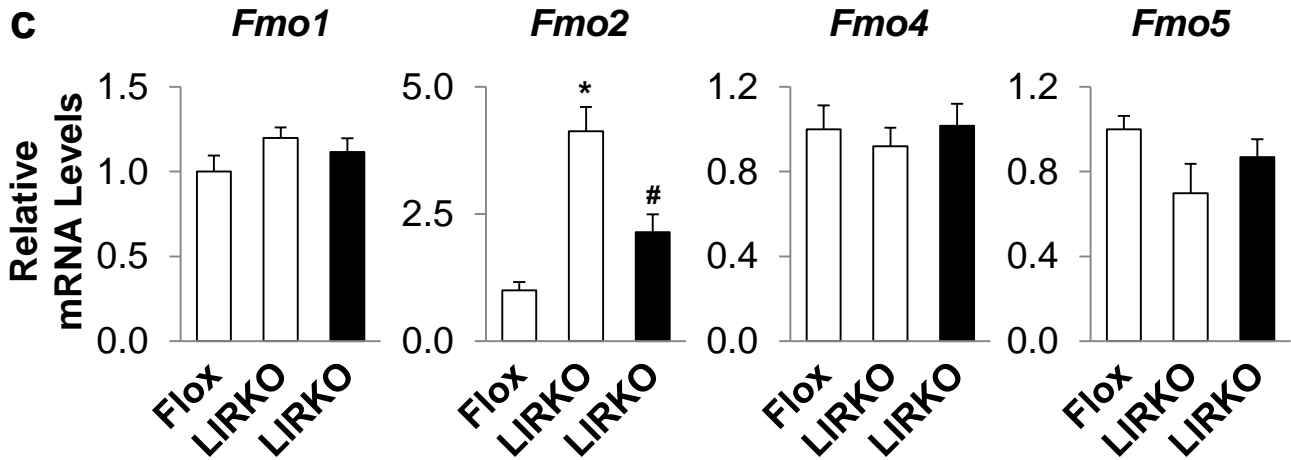

**d**

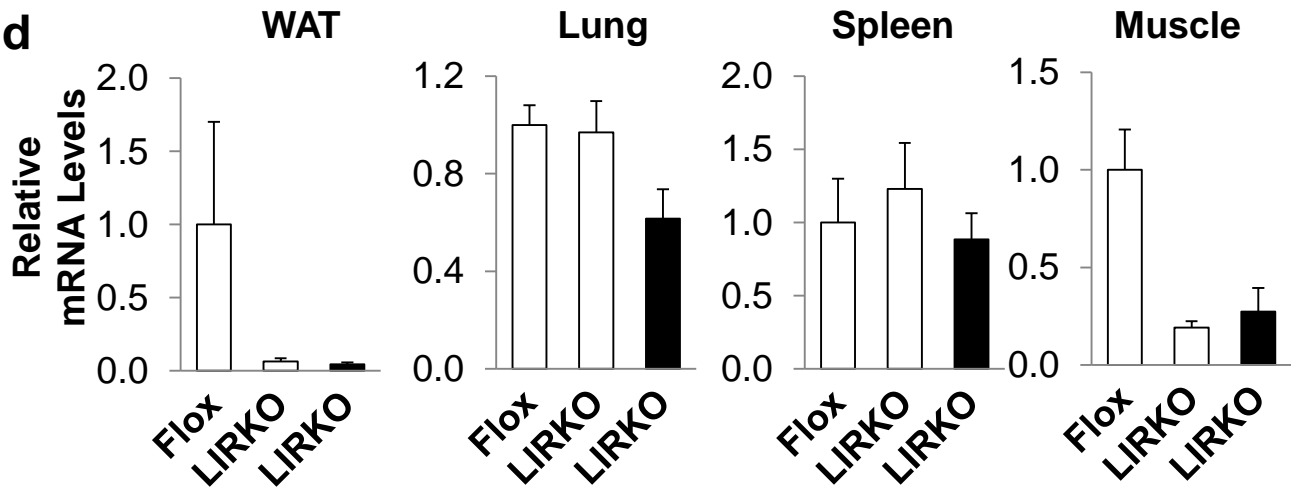

Supplementary Figure 2

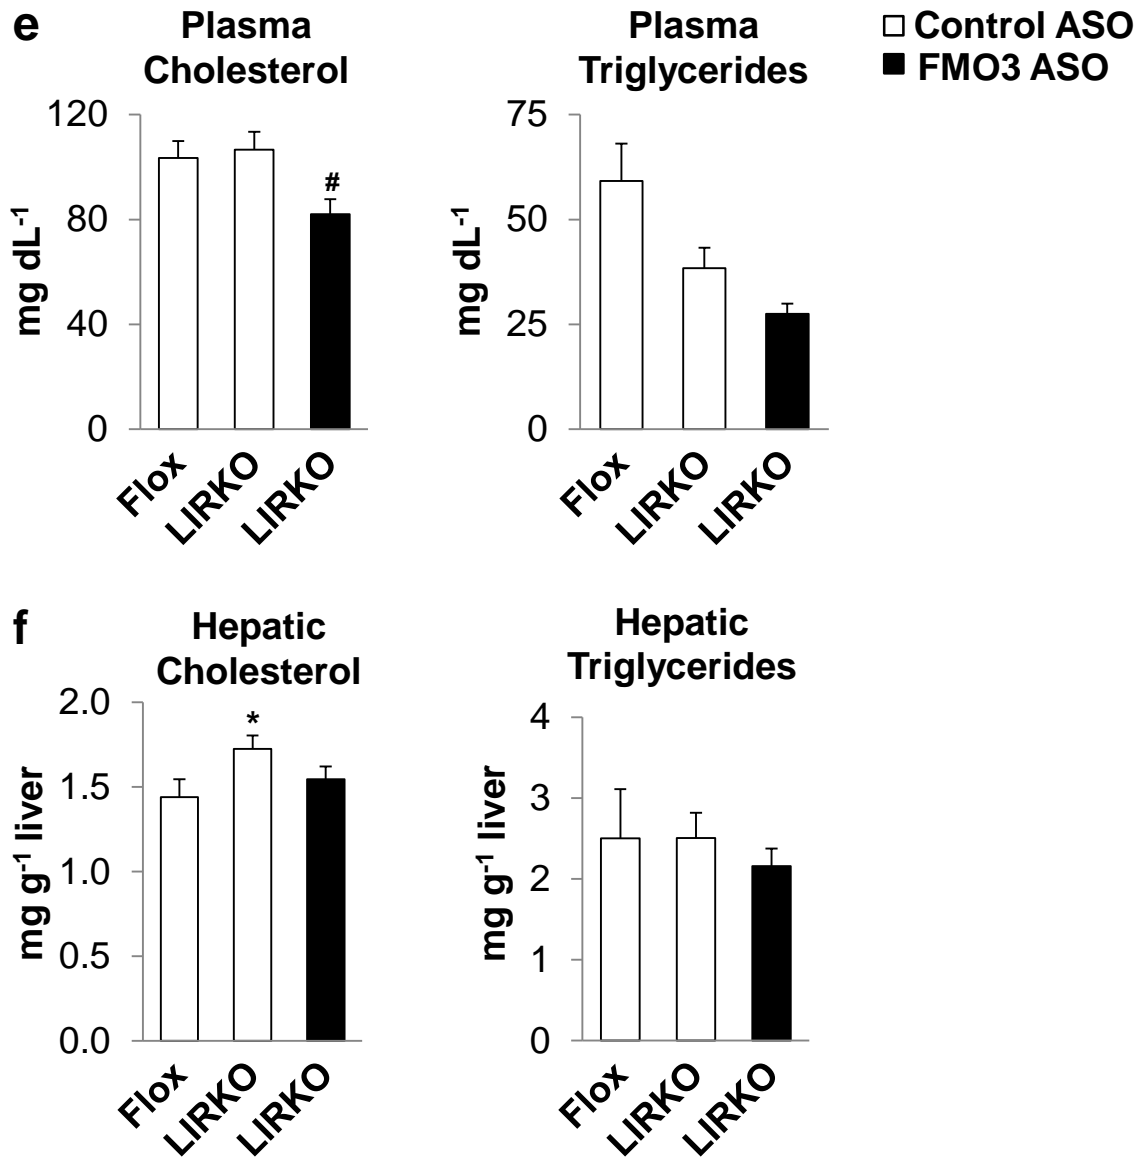

Supplementary Figure 2

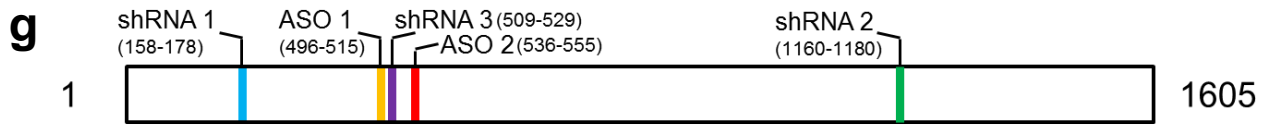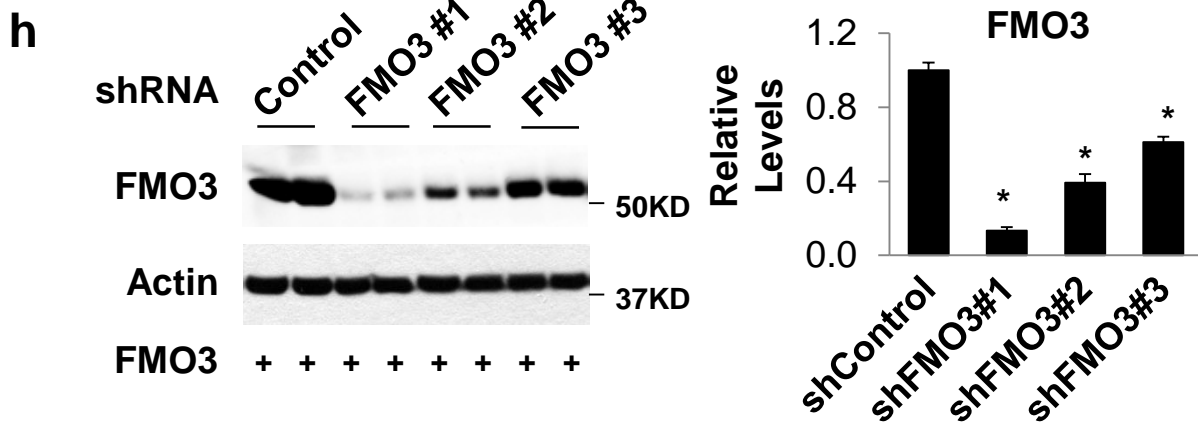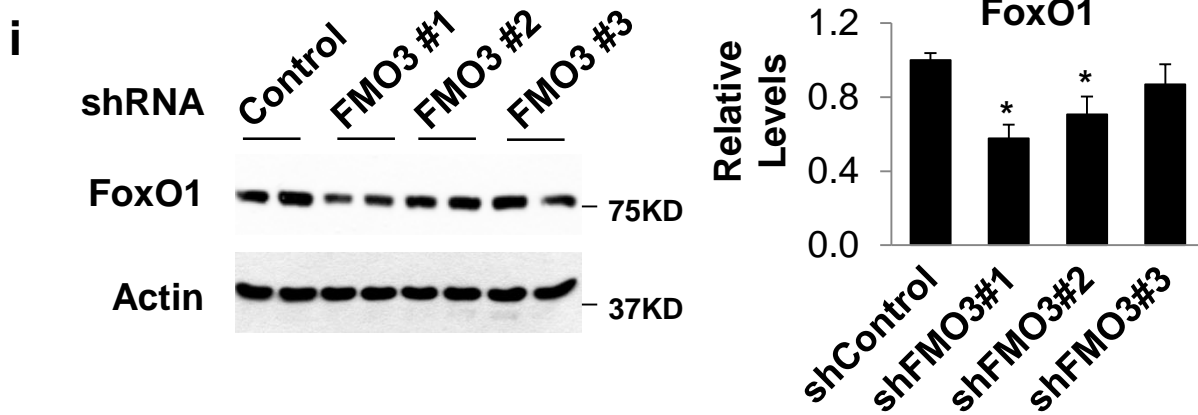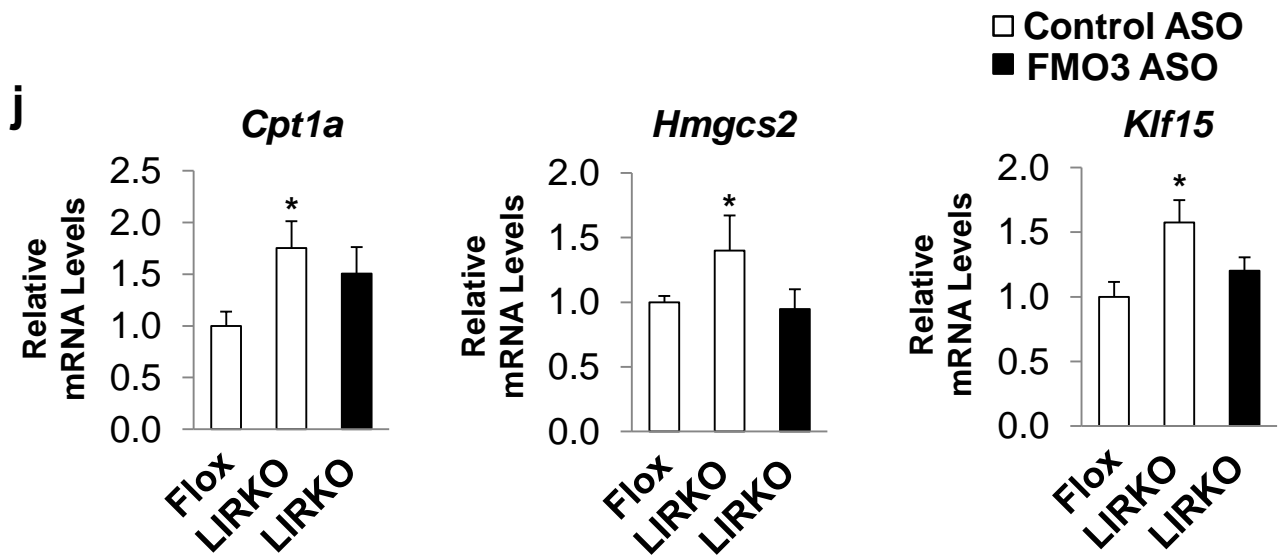

## Supplementary Figure 2

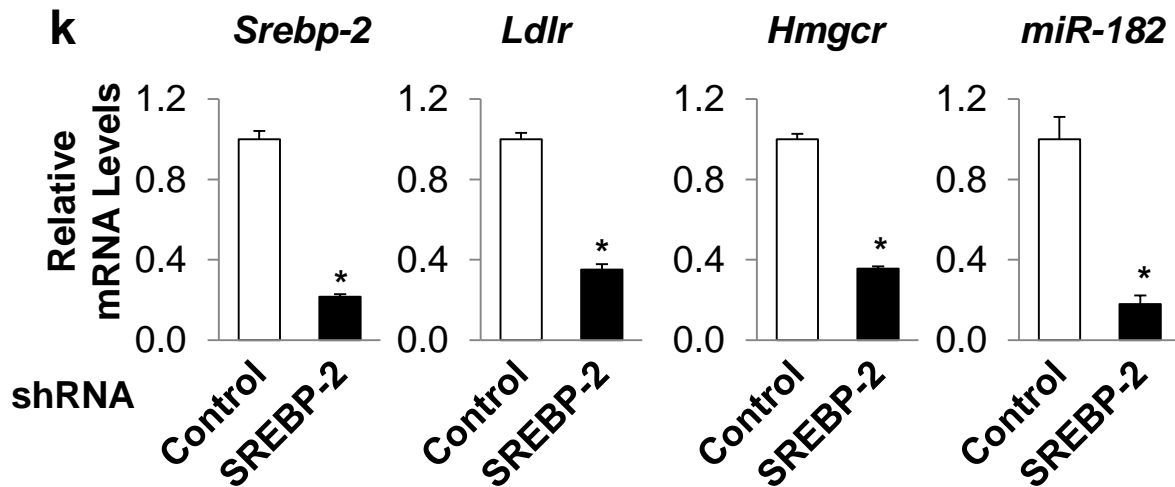

### Supplementary Figure 2. Knockdown of FMO3 reduces FoxO1 *in vivo* and *in vitro*.

Four to six week old male Flox and LIRKO mice were treated with control or FMO3 ASO for seven weeks and sacrificed in the non-fasted state, at which point body weight was measured (a) and plasma was taken for measuring chemistries (b). Gene expression in liver (c, j) or other tissues (d) was measured by real-time PCR. Cholesterol and triglycerides were measured in both plasma drawn after a four-hour fast (e) and liver (f). Data represent the mean  $\pm$  SEM; n = 5 - 7; \* p < 0.05 (Student's t-test), LIRKO versus Flox mice treated with the control ASO; # p < 0.05 control versus FMO3 ASO treated LIRKO mice. (g) Schematic of the shRNAs and ASOs against FMO3 used in this study. (h) 293A cells were transfected with wildtype mouse FMO3 and either shlacZ, shFMO3#1, shFMO3#2 or shFMO3#3, to show knockdown of FMO3. A representative western blot shown on left, and quantification of two independent experiments is shown on right. Data represent the mean  $\pm$  SEM; \* p < 0.05 (Student's t-test) versus control shRNA transfected wells. (i, k) H2.35 hepatoma cells were transfected with shRNAs as indicated. (i) Whole cell lysates were prepared and subjected to western blotting. Representative western blot shown on left, and quantification of three independent experiments is shown on right. (k) Alternatively, gene expression was measured using real-time PCR; representative results of three independent experiments are shown; n = 3 replicates per condition. Data represent the mean  $\pm$  SEM; \* p < 0.05 (Student's t-test) versus control shRNA transfected wells.

Supplementary Figure 3

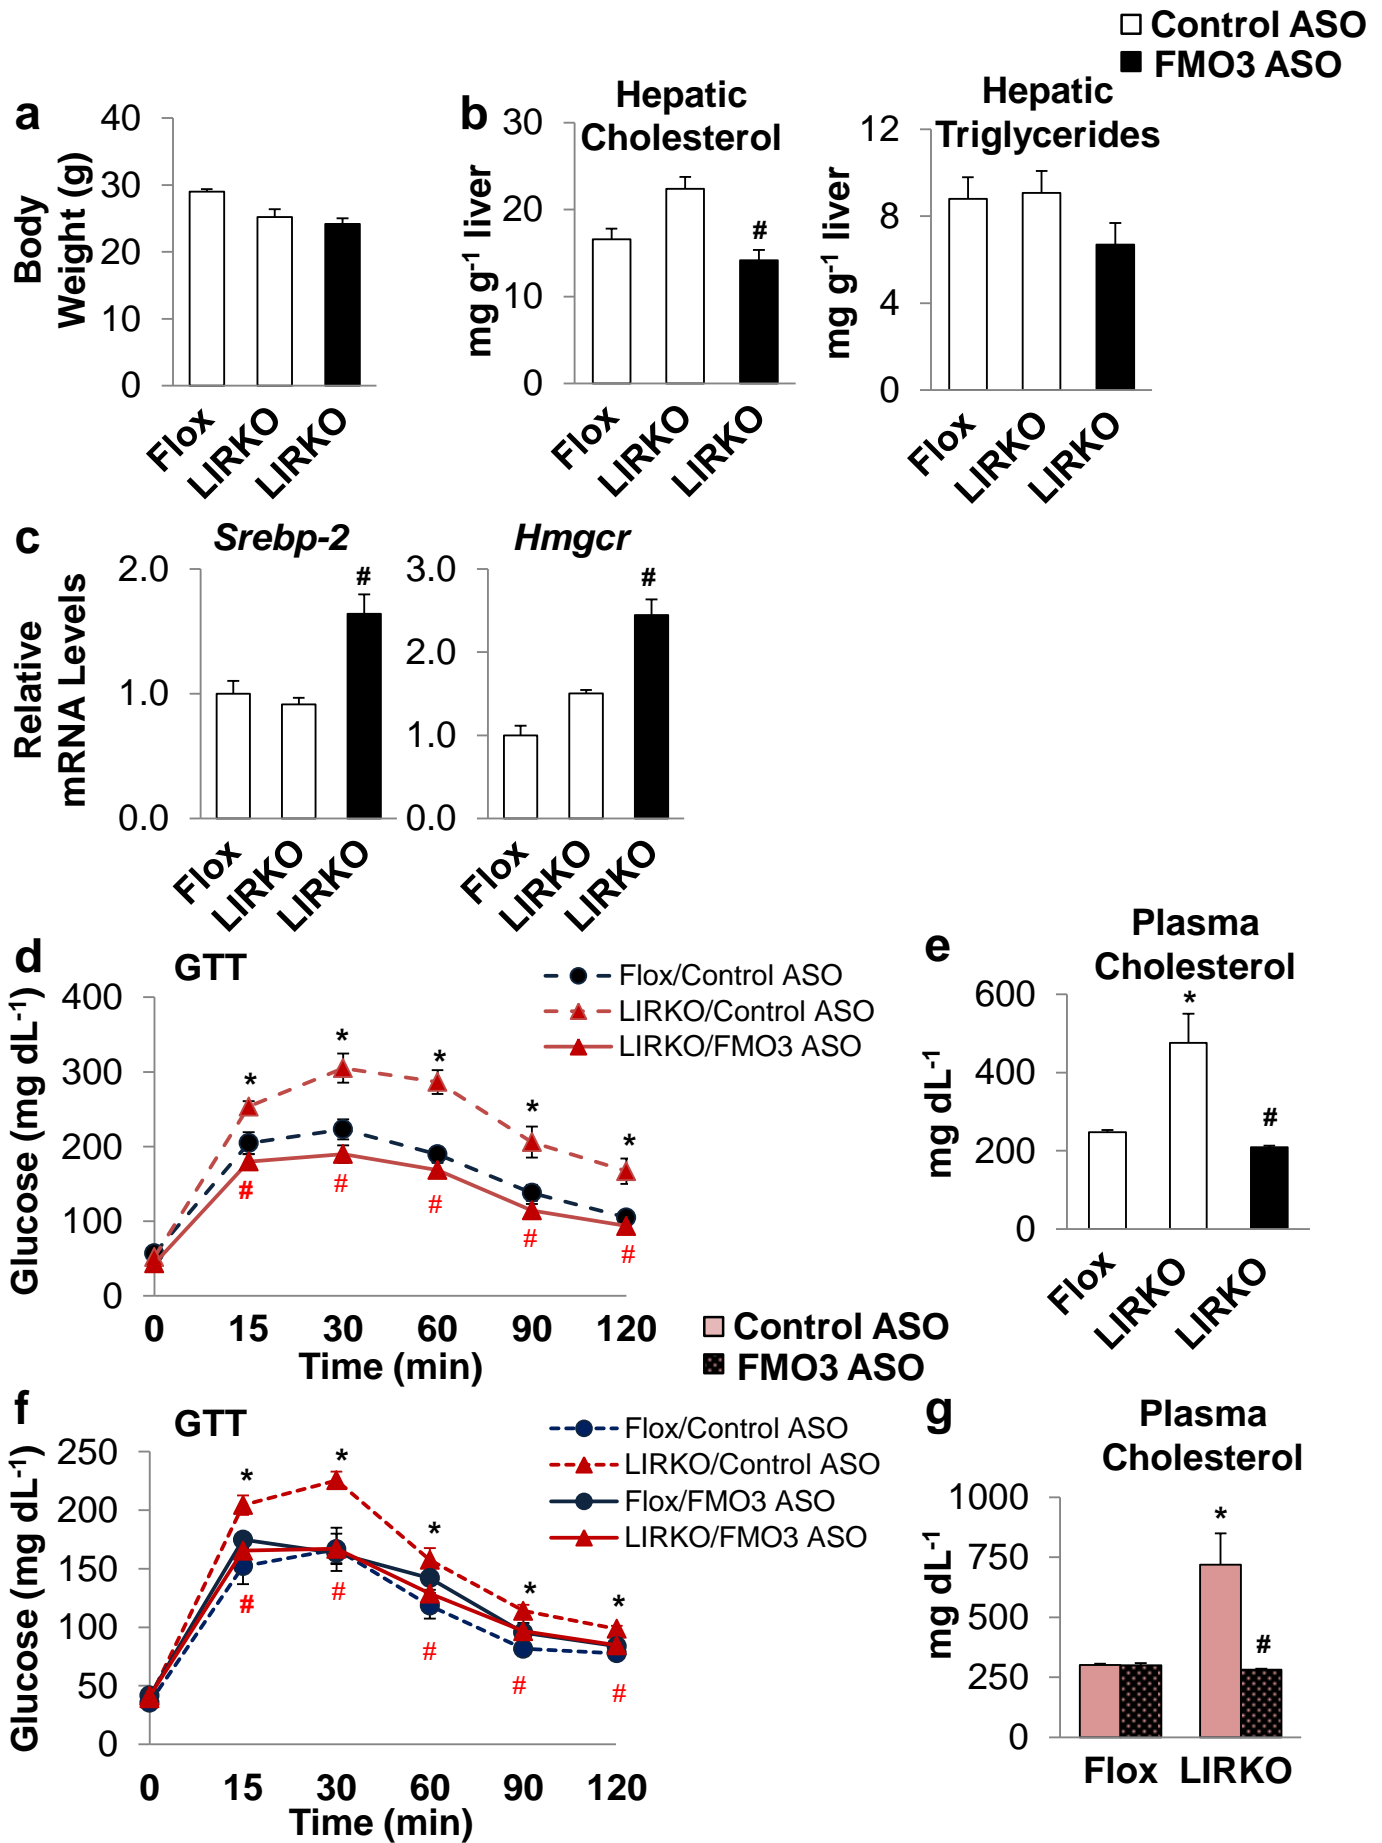

**Supplementary Figure 3. Knockdown of FMO3 in LIRKO mice on atherogenic diets.**

(a to c) Four to six week old male Flox and LIRKO mice were placed on an atherogenic Paigen diet and treated with control or FMO3 ASO for 16 weeks. Mice were sacrificed in the non-fasted state, at which time body weights were measured (a) and livers collected for measurement of lipids (b) and gene expression (c). Data represent the mean  $\pm$  SEM; n = 5 - 7; \* p < 0.05 (Student's t-test) LIRKO versus Flox mice treated with the control ASO; # p < 0.05 (Student's t-test) control versus FMO3 ASO treated LIRKO mice. (d to g) Four to six week old male (d, e) and female (f, g) Flox and LIRKO mice were placed on a Western diet and treated with control or FMO3 ASO for five weeks. Glucose tolerance testing was performed after four doses of ASO (d, f) and four-hour fasted plasma was collected for cholesterol measurement after five doses of ASO (e, g). Data represent the mean  $\pm$  SEM; n = 5; \* p < 0.05 (Student's t-test) LIRKO versus Flox mice treated with the same ASO; # p < 0.05 (Student's t-test) control versus FMO3 ASO treated LIRKO mice.

# Supplementary Figure 4

**a**

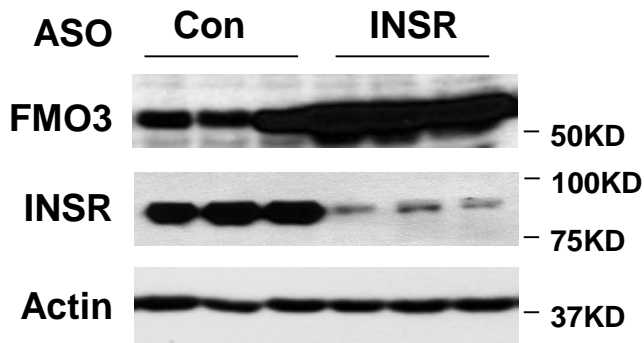

**b**

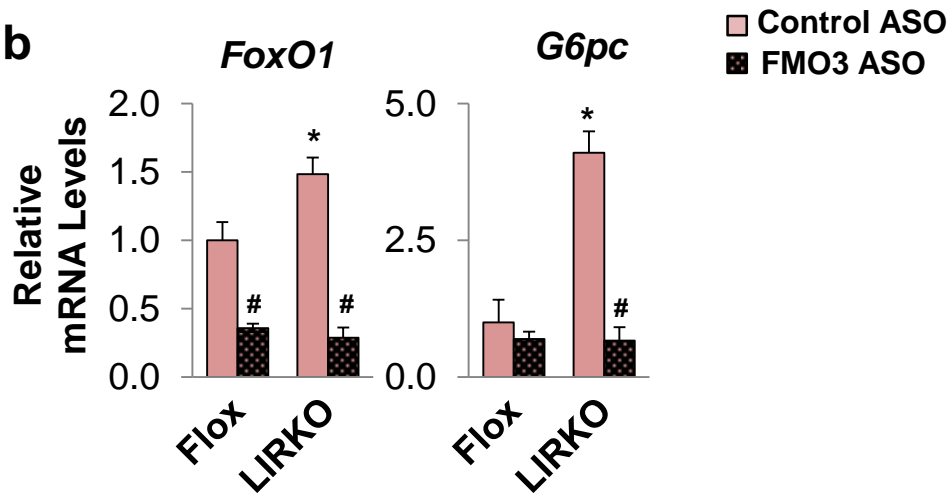

**c**

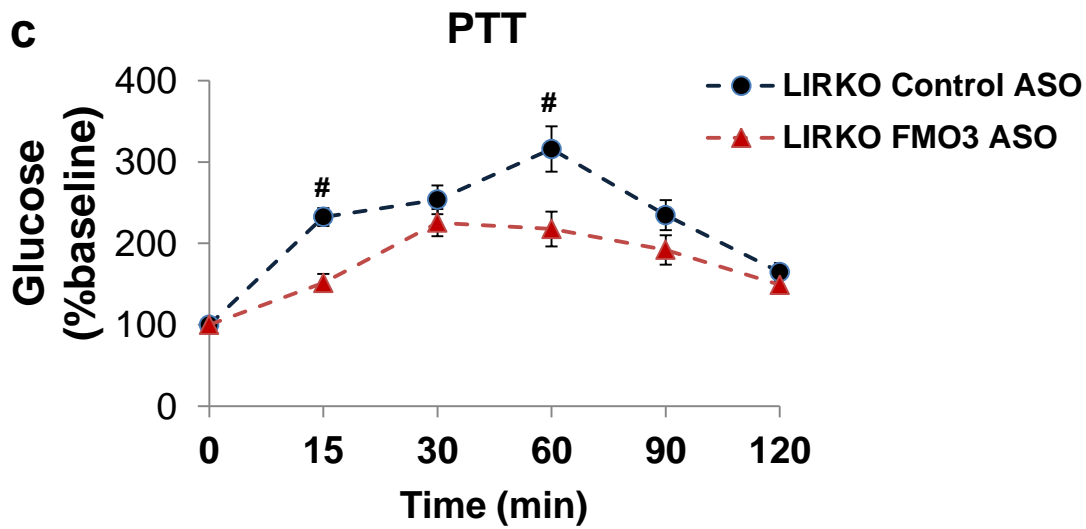



## Supplementary Figure 4

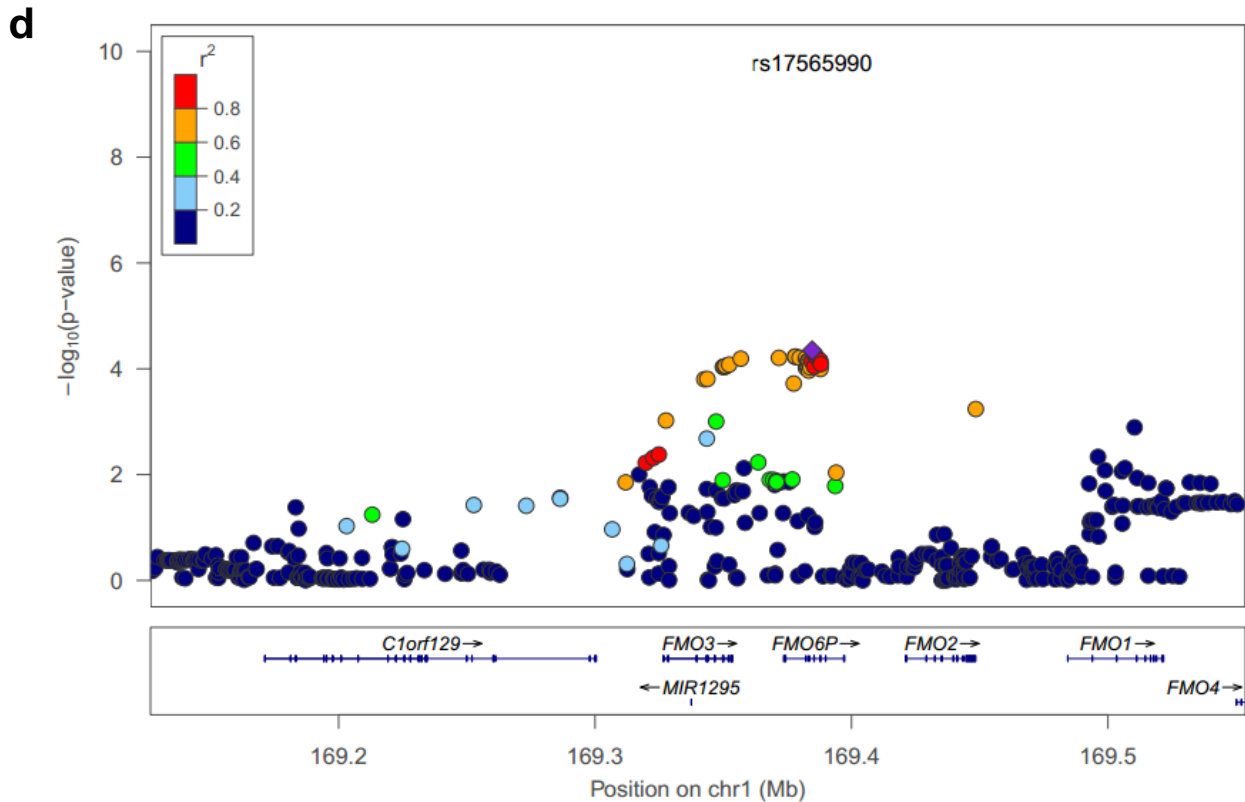

### Supplementary Figure 4. FMO3 and glucose metabolism.

(a) Six week old male *ob/ob* mice were treated with control ASO (Con) or ASO targeting the insulin receptor (INSR) for four weeks and were sacrificed in the non-fasted state. Protein levels were measured by western blotting whole cell lysates. (b, c) Four to six week old female Flox and LIRKO mice were treated with control or FMO3 ASO for seven weeks and sacrificed in the non-fasted state. Hepatic gene expression (b) was measured by real-time PCR. Pyruvate tolerance testing (c) was performed after six weeks of ASO administration. Data represent the mean  $\pm$  SEM;  $n = 5$ ; \*  $p < 0.05$  (Student's t-test) Flox versus similarly treated LIRKO mice; #  $p < 0.05$  (Student's t-test) control versus FMO3 ASO treated LIRKO mice. (d) LocusZoom<sup>1</sup> was used to query the Meta-Analysis of Glucose and Insulin-related traits Consortium (MAGIC)<sup>2</sup> data set ( $n = 15,234$  nondiabetic individuals) for associations between the FMO3 locus and glucose levels. Shown above are associations with glucose levels measured two hours after a glucose challenge and adjusted for body mass index. The purple diamond indicates the lead SNP ( $p = 4.51 \times 10^{-5}$ ). Evaluated SNPs are colored based on their correlation with the lead SNP.

Supplementary Figure 5

Fig. 1d

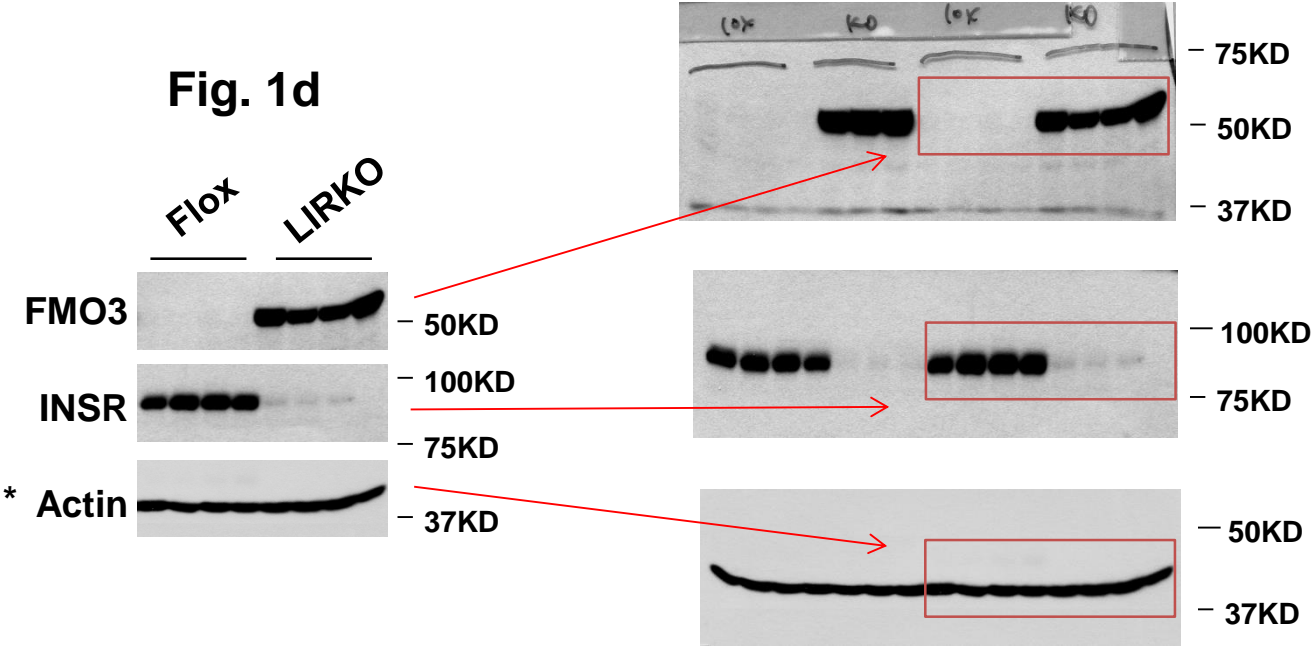

Supplementary Figure 5

Fig. 2b

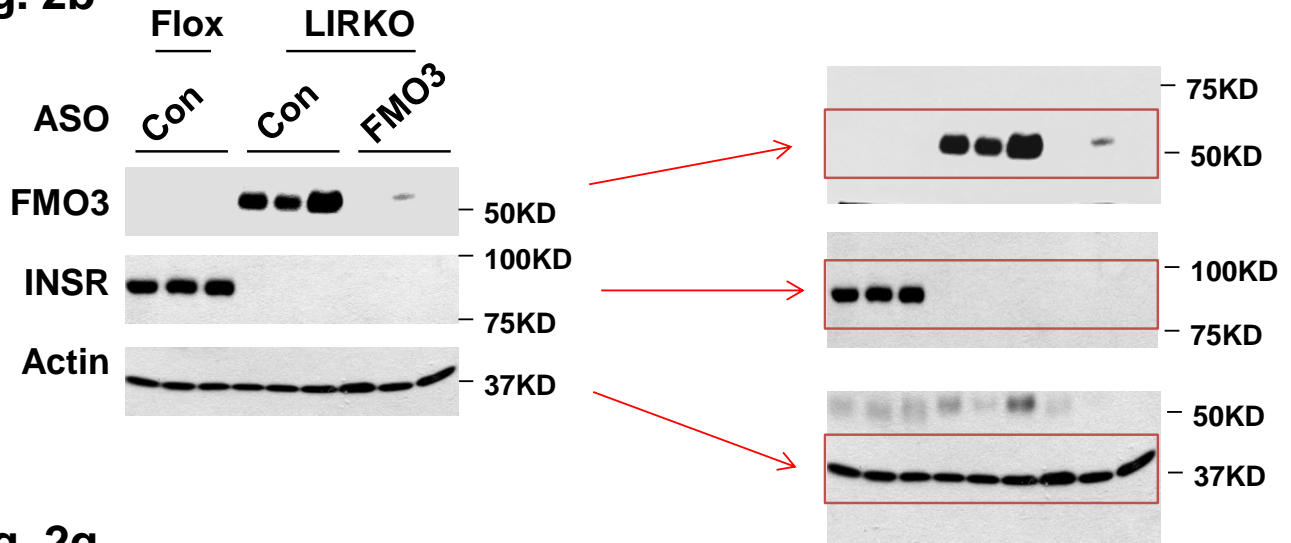

Fig. 2g

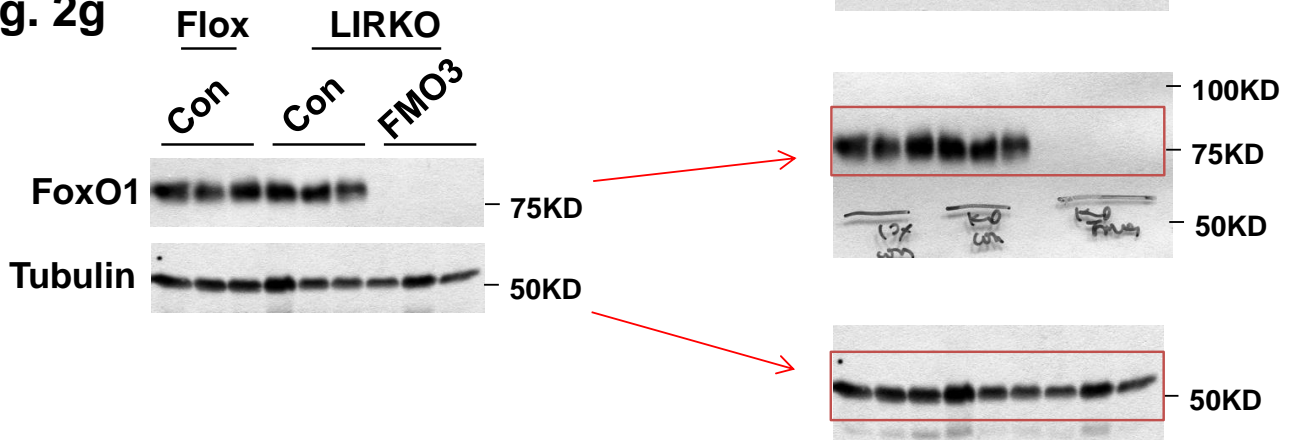

Fig. 2i

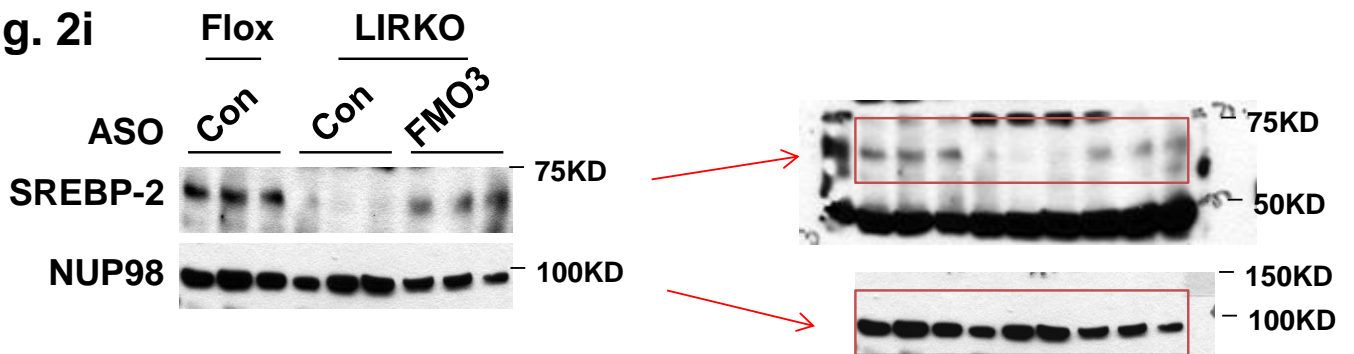

Supplementary Figure 5

Fig. 2p

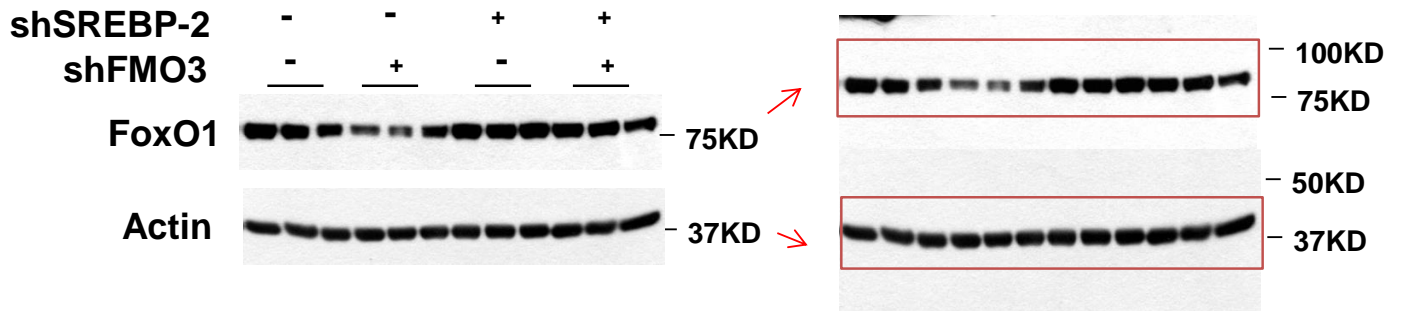

Fig. 2s

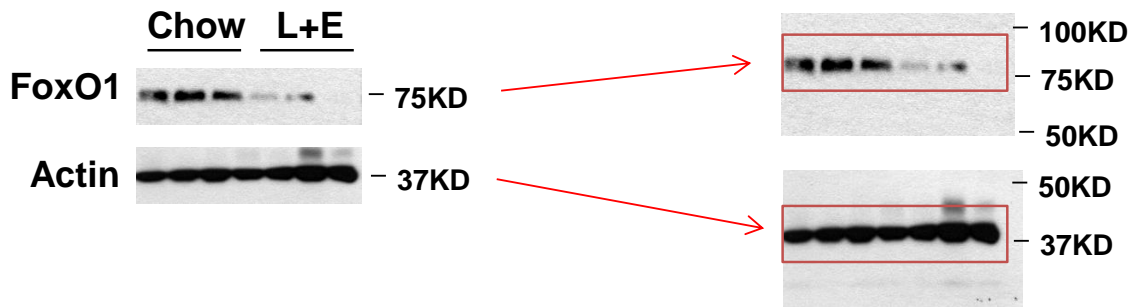

Supplementary Figure 5

Fig. 4d

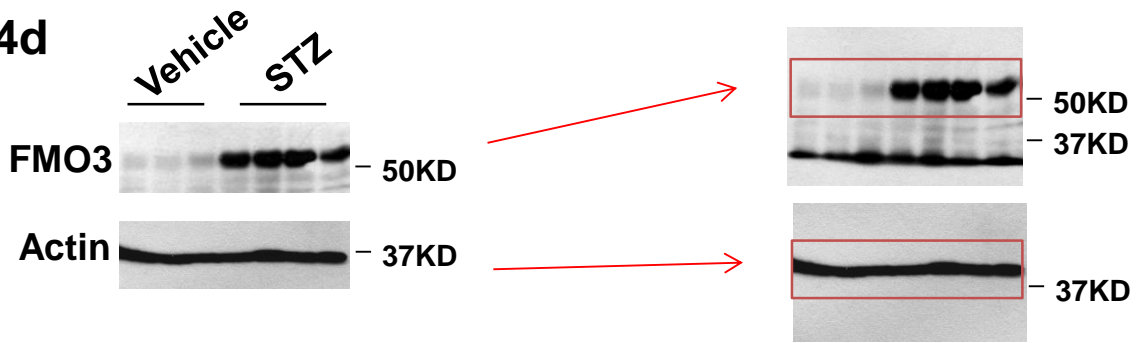

Fig. 4h

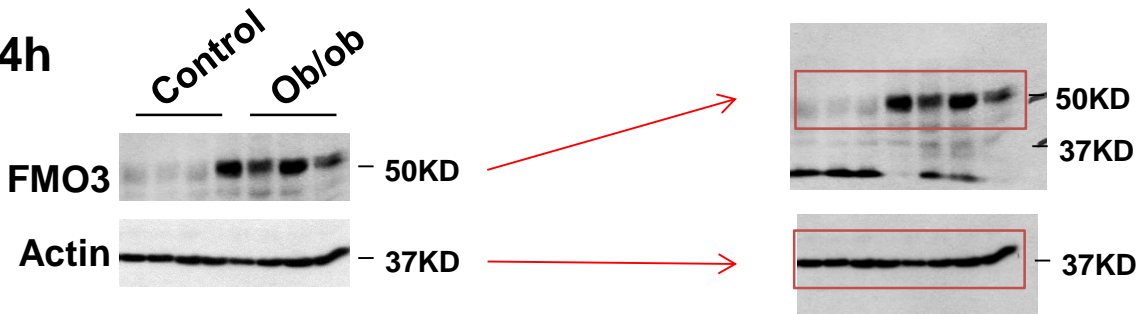

Fig. 4j

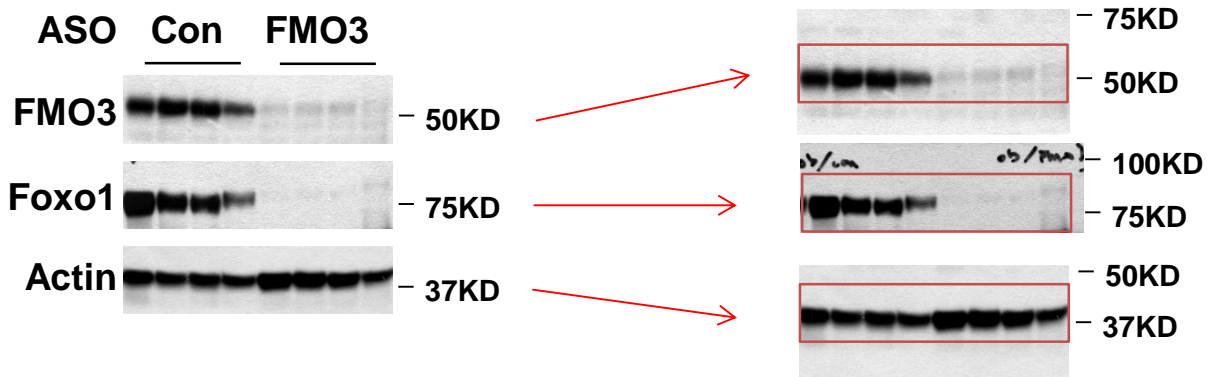

Supplementary Figure 5. Uncropped scans of key western blots.

**Supplementary Table 1. Real-time PCR primers used in this study.**

| Gene                      | Sequence                   |
|---------------------------|----------------------------|
| Mouse- <i>Fmo3</i> -F     | GGAACCTGCACTTTGCCTTC       |
| Mouse- <i>Fmo3</i> -R     | TAGGAGATTGGGCTTTGCAC       |
| Mouse- <i>Fmo1</i> -F     | AAACAAGCATAGCGGGTTTG       |
| Mouse- <i>Fmo1</i> -R     | ATCCGGTTTTGCGTTGATAG       |
| Mouse- <i>Fmo2</i> -F     | AGCTGTGGTCTTCGAGGATG       |
| Mouse- <i>Fmo2</i> -R     | GGCAAGCTACACAAGCCTTT       |
| Mouse- <i>Fmo4</i> -F     | CGGAGCAGCTCATTAAAAGG       |
| Mouse- <i>Fmo4</i> -R     | CTGAGTGAGCTCGTCCATGT       |
| Mouse- <i>Fmo5</i> -F     | TGCCCTCACAAAGTGAAATG       |
| Mouse- <i>Fmo5</i> -R     | GCTGGCTGTCCACATACCTT       |
| Mouse- <i>FoxO1</i> -F    | TCCCATCATGACAGAGCAGGATGA   |
| Mouse- <i>FoxO1</i> -R    | CAGACTGGGCAGCGTAGACGC      |
| Mouse- <i>Pck1</i> -F     | ATCCCAACTCGAGATTCTGC       |
| Mouse- <i>Pck1</i> -R     | CATGGCTGCTCCTACAAACA       |
| Mouse- <i>G6pc</i> -F     | TGGCTTTTTCTTTCCTCGAA       |
| Mouse- <i>G6pc</i> -R     | TCGGAGACTGGTTCAACCTC       |
| Mouse- <i>Igfbp1</i> -F   | ATTAGCTGCAGCCCAACAGA       |
| Mouse- <i>Igfbp1</i> -R   | GACACACCAGCAGAGTCCAG       |
| Mouse- <i>Srebp-2</i> -F  | GCGTTCTGGAGACCATGGA        |
| Mouse- <i>Srebp-2</i> -R  | ACAAAGTTGCTCTGAAAACAAATCA  |
| Mouse- <i>Ldlr</i> -R     | GAGGAGCAGCCACATGGTAT       |
| Mouse- <i>Ldlr</i> -F     | GCTCGTCCTCTGTGGTCTTC       |
| Mouse- <i>Hmgcr</i> -F    | CTTGTGGAATGCCTTGTGATTG     |
| Mouse- <i>Hmgcr</i> -R    | AGCCGAAGCAGCACATGAT        |
| Mouse- <i>Fdps</i> -R     | ATGGAGATGGGCGAGTTCTTC      |
| Mouse- <i>Fdps</i> -F     | CCGACCTTTCCCGTCACA         |
| Mouse- <i>Fdft1</i> -F    | CCAACTCAATGGGTCTGTTCTCCT   |
| Mouse- <i>Fdft1</i> -R    | TGGCTTAGCAAAGTCTTCCAACCT   |
| Mouse- <i>Cyp51</i> -F    | AGCTGTACGCAGACCTGGAT       |
| Mouse- <i>Cyp51</i> -R    | ACGCCCGTCCTTGTATGTAG       |
| Mouse- <i>Srebp-1c</i> -F | GGCCCGGAAGTCACTGT          |
| Mouse- <i>Srebp-1c</i> -R | GGAGCCATGGATTGCACATT       |
| Mouse- <i>Fasn</i> -F     | GCTGCGGAAACTTCAGGAAAT      |
| Mouse- <i>Fasn</i> -R     | AGAGACGTGTCACTCCTGGACTT    |
| Mouse- <i>Cyp27a1</i> -F  | GGAGGATTGCAGAACTGGAG       |
| Mouse- <i>Cyp27a1</i> -R  | TGCGGGACACAGTCTTACTT       |
| Mouse- <i>Cyp7a1</i> -F   | GTCCGGATATTCAAGGATGCA      |
| Mouse- <i>Cyp7a1</i> -R   | AGCAACTAAACAACCTGCCAGTACTA |
| Mouse- <i>Cyp8b1</i> -F   | GGAACAGCCTATCCTTGGTGA      |
| Mouse- <i>Cyp8b1</i> -R   | GGCCCCAGTAGGGAGTAGAC       |
| Mouse- <i>Abca1</i> -F    | CATCCTCTCCCAGAGCAAAA       |
| Mouse- <i>Abca1</i> -R    | CCACATCCACAACCTGTCTGG      |
| Mouse- <i>Abcg5</i> -F    | TGCCCATTCCTTTAAAATCC       |
| Mouse- <i>Abcg5</i> -R    | GATGAACTGGACCCCTTGG        |

|                         |                            |
|-------------------------|----------------------------|
| Mouse- <i>Abcg8</i> -F  | GGGGCTGATGCAGATTCA         |
| Mouse- <i>Abcg8</i> -R  | GTAGCTGATGCCGATGACAA       |
| Mouse- <i>Bsep</i> -F   | AAGGACAGCCACACCAACTC       |
| Mouse- <i>Bsep</i> -R   | CCAGAACATGACAAACGGAA       |
| Mouse- <i>Oatp1</i> -F  | TAATCGGGCCAATCTTC          |
| Mouse- <i>Oatp1</i> -R  | ACTCCCATAATGCCCTTGG        |
| Mouse- <i>Ntcp</i> -F   | TCCGTCGTAGATTCTTTGC        |
| Mouse- <i>Ntcp</i> -R   | AGGGGGACATGAACCTCAG        |
| Mouse- <i>Mrp2</i> -F   | TCTGTGAGTGCAAGAGACAGGT     |
| Mouse- <i>Mrp2</i> -R   | TCCAGGACCAAGAGATTTGC       |
| Mouse- <i>Lxr</i> -F    | ACTTCAGTTACAACCGGGAAGA     |
| Mouse- <i>Lxr</i> -R    | GAGCAAACCTCAGCATCATTGAG    |
| Mouse- <i>Fxr</i> -F    | CACGGTTGTAAATACAGACTAGATAG |
| Mouse- <i>Fxr</i> -R    | TTGATTTAATTAGGCCAAAAGG     |
| Mouse- <i>Shp</i> -F    | CTGCCTGGAGTCTTTCTGGA       |
| Mouse- <i>Shp</i> -R    | GGTACCAGGGCTCCAAGACT       |
| Mouse- <i>36b4</i> -F   | AGATTCGGGATATGCTGTTGGC     |
| Mouse- <i>36b4</i> -R   | TCGGGTCCTAGACCAGTGTTTC     |
| Mouse- <i>18s</i> -F    | GTAACCCGTTGAACCCCAT        |
| Mouse- <i>18s</i> -R    | CCATCCAATCGGTAGTAGCG       |
| Mouse- <i>Tat</i> -F    | CACGGCTAGACACAGCTCAA       |
| Mouse- <i>Tat</i> -R    | CTATCCAGTCGGGAGGAGGT       |
| Rat- <i>36b4</i> -F     | TTCCCACTGGCTGAAAAGGT       |
| Rat- <i>36b4</i> -R     | CGCAGCCGCAAATGC            |
| Rat- <i>Fmo3</i> -F     | GTGTTTTCCAGACTTCCC         |
| Rat- <i>Fmo3</i> -R     | ATACCACCAGTCAGAAAT         |
| Rat- <i>Fmo1</i> -F     | GGTCCTGAAAGGTGCGACTA       |
| Rat- <i>Fmo1</i> -R     | CCAAATCCGCTATGCTTGTT       |
| Rat- <i>Fmo2</i> -F     | CCTGGTGCCTCAGAACAAT        |
| Rat- <i>Fmo2</i> -R     | CTTTGATGGCTCCGTACAGC       |
| Rat- <i>Fmo4</i> -F     | CAGTGGAATAGCAGCACAGG       |
| Rat- <i>Fmo4</i> -R     | TTCAAAGGGTAGCCACCAAC       |
| Rat- <i>Fmo5</i> -F     | TGAAGGTGAAAGGCAATGTG       |
| Rat- <i>Fmo5</i> -R     | TGTAGCCTGTGGCAAAGATG       |
| Rat- <i>Pck1</i> -F     | ATGAAGTTTGATGCCCAAGG       |
| Rat- <i>Pck1</i> -R     | ACCCCATCACTTGTCTCAG        |
| Rat- <i>Srebp-1c</i> -F | GCGCTACCGTTCCTCTATCA       |
| Rat- <i>Srebp-1c</i> -R | ACATCTGTGCCTCCTCCACT       |
| Rat- <i>Tat</i> -F      | AGCTTCCTCAAGTCCAATGC       |
| Rat- <i>Tat</i> -R      | TTCATCTCAAGTCCAATGC        |

---

**Supplementary Table 2. C<sub>T</sub> values of genes measured by real time PCR.**

|                 | <i>Flox or Wildtype Male Mice</i> |     |      |        |        | <b>Primary Rat<br/>Hepatocytes</b> |
|-----------------|-----------------------------------|-----|------|--------|--------|------------------------------------|
|                 | Liver                             | WAT | Lung | Spleen | Muscle |                                    |
| <i>Fmo3</i>     | 31                                | 28  | 23   | 31     | 28     | 27                                 |
| <i>Fmo1</i>     | 20                                |     |      |        |        | 26                                 |
| <i>Fmo2</i>     | 24                                |     |      |        |        | 32                                 |
| <i>Fmo4</i>     | 25                                |     |      |        |        | 26                                 |
| <i>Fmo5</i>     | 19                                |     |      |        |        | 23                                 |
| <i>FoxO1</i>    | 20                                |     |      |        |        |                                    |
| <i>Pck1</i>     | 15                                |     |      |        |        | 25                                 |
| <i>Igfbp1</i>   | 21                                |     |      |        |        |                                    |
| <i>Srebp-2</i>  | 20                                |     |      |        |        |                                    |
| <i>Hmgcr</i>    | 20                                |     |      |        |        |                                    |
| <i>Fdps</i>     | 21                                |     |      |        |        |                                    |
| <i>Fdft1</i>    | 19                                |     |      |        |        |                                    |
| <i>Cyp51</i>    | 20                                |     |      |        |        |                                    |
| <i>Ldlr</i>     | 19                                |     |      |        |        |                                    |
| <i>Srebp-1c</i> |                                   |     |      |        |        | 24                                 |



**Supplementary Table 3. Antibodies used in this study.**

| <b>Protein</b> | <b>Catalog #</b> | <b>Company</b>           |
|----------------|------------------|--------------------------|
| FMO3           | Ab126790         | Abcam                    |
| FoxO1          | 2880             | Cell Signaling           |
| NUP98          | 2598             | Cell Signaling           |
| INSR           | sc-711           | Santa Cruz Biotechnology |
| SR-B1          | NB400-101        | Novus Biologicals        |
| Sortilin       | Ab16640          | Abcam                    |
| Beta-actin     | sc-47778         | Santa Cruz Biotechnology |
| Alpha-tubulin  | sc-8035          | Santa Cruz Biotechnology |

## References

1. Pruim, R.J. et al. LocusZoom: regional visualization of genome-wide association scan results. *Bioinformatics* **26**, 2336-7 (2010).
2. Saxena, R. et al. Genetic variation in GIPR influences the glucose and insulin responses to an oral glucose challenge. *Nat Genet* **42**, 142-8 (2010).
